# Supplementary material
Source: Research Square preprint supplement (doi:10.21203/rs.3.rs-8939466/v1)
Supplement: Supplementary file 1 [file 273ec6437251a9cd5448736a.docx]

**Supplementary Table 1.**

| **Patients** | **Gender** | **Age/**  **years** | **Histologic grade** | **Ki67** | **Region** | **Tumor volume cm³** | **Alive/Died** | **Survival/ day** |
| --- | --- | --- | --- | --- | --- | --- | --- | --- |
| **GBM 1** | M | 68 | IV | 20 | Right Parietal | 7.3 | Alive | 540 |
| **GBM 2** | M | 54 | IV | 50 | Left Frontal | 43 | Died | 509 |
| **GBM 3** | F | 74 | IV | 25 | Right Parietal | 44 | Died | 246 |
| **GBM 4** | F | 66 | IV | 50 | Right Parietal | 16.5 | Died | 540 |
| **GBM 5** | M | 51 | IV | 15 | Left Parietal | 21.2 | Alive | 540 |
| **GBM 6** | F | 59 | IV | 50 | Left Parietal | 58.5 | Died | 152 |
| **GBM 7** | F | 55 | IV | 50 | Left Frontal | 21.4 | Died | 517 |
| **GBM 8** | F | 64 | IV | 30 | Left Frontal | 23.9 | Died | 492 |
| **GBM 9** | M | 51 | IV | 20 | Right Frontal | 99.1 | Died | 188 |
| **GBM 10** | M | 51 | IV | 20 | Right Parietal | 46.2 | Alive | 540 |
| **GBM 11** | M | 80 | IV | 20 | Left Frontal | 23.2 | Died | 540 |
| **GBM 12** | F | 36 | IV |  | Right Parietal | 23.2 | Alive | 540 |
| **GBM 13** | M | 60 | IV | 50 | Right Parietal | 74,5 | Died | 162 |
| **GBM 14** | F | 45 | IV | 20 | Right Temporal | 17.5 | Died | 184 |
| **GBM 15** | F | 68 | IV | 30 | Left Parietal | 5.9 | Died | 48 |
| **GBM 16** | M | 64 | IV | 70 | Left Frontal | 93.7 | Died | 371 |
| **GBM 17** | F | 70 | IV | 40 | Right Temporal | 37.3 | Died | 58 |
| **GBM 18** | F | 64 | IV | 50 | Left Temporal | 44.3 | Died | 81 |
| **GBM 19** | M | 59 | IV | 40 | Right Temporal | 24.2 | Died | 357 |
| **GBM 20** | M | 75 | IV | 10 | Right Occipital | 57.1 | Alive | 540 |
| **GBM 21** | F | 34 | IV | 60 | Left Frontal | 95.4 | Died | 255 |
| **GBM 22** | M | 50 | IV | 50 | Left Parietal | 13.9 | Died | 540 |
| **GBM 23** | M | 42 | IV | 60 | Right Frontal | 33.5 | Died | 40 |
| **GBM 24** | F | 67 | IV | 30 | Right Parietal | 34.1 | Died | 71 |
| **GBM 25** | F | 62 | IV |  | Right Occipital | 3.3 | Alive | 540 |
| **GBM 26** | F | 58 | IV | 20 | Left Frontal | 67.8 | Alive | 540 |
| **GBM 27** | F | 73 | IV | 70 | Right Temporal | 23.3 | Alive | 540 |
| **GBM 28** | M | 31 | IV |  | Right Frontal | 30.4 | Alive | 540 |
| **GBM 29** | M | 44 | IV | 40 | Right Parietal | 30.8 | Died | 214 |
| **GBM 30** | F | 56 | IV | 30 | Left Temporal | 77.4 | Died | 167 |
| **GBM 31** | F | 60 | IV | 25 | Left Parietal | 10.3 | Alive | 540 |
| **GBM 32** | M | 43 | IV |  | Left Frontal | 37.1 | Alive | 540 |
| **GBM 33** | F | 76 | IV | 40 | Left Temporal | 30.4 | Died | 138 |
| **GBM 34** | F | 46 | IV |  | Left Parietal | 50.2 | Died | 246 |
| **GBM 35** | M | 47 | IV | 50 | Left Temporal | 9.2 | Alive | 540 |
| **GBM 36** | F | 54 | IV | 50 | Left Frontal | 58.6 | Died | 468 |
| **GBM 37** | F | 79 | IV | 15 | Left Parietal | 51.2 | Died | 117 |
| **GBM 38** | F | 56 | IV |  | Left Frontal | 17.6 | Died | 145 |
| **GBM 39** | M | 62 | IV |  | Left Frontal | 9.8 | Alive | 540 |
| **GBM 40** | M | 55 | IV | 30 | Right Temporal | 41.5 | Alive | 540 |
| **GBM 41** | M | 74 | IV |  | Left Parietal | 4 | Died | 52 |
| **GBM 42** | M | 74 | IV | 20 | Left Frontal | 15.6 | Died | 540 |
| Men 1 | F | 63 | I | 2 | Cerebellar | 37 | Alive | 540 |
| Men 2 | M | 64 | II | 20 | Olactor Grout | 75.6 | Alive | 540 |
| Men 3 | F | 51 | I | 1 | Frontal | 80.5 | Alive | 540 |
| Men 4 | F | 50 | I | 2 | Frontal | 53.2 | Alive | 540 |
| Men 5 | M | 56 | II | 20 | Frontoparietal | 36.4 | Alive | 540 |
| Men 6 | F | 37 | II | 5 | Olactor Grout | 10.2 | Alive | 540 |
| Men 7 | F | 56 | I | 1 | Parietal | 20.2 | Alive | 540 |
| Men 8 | F | 40 | II | 20 | Parietoccipital | 33.6 | Alive | 540 |
| Men 9 | F | 46 | II | 40 | Spheonid Wing | 43.2 | Alive | 540 |
| Men 10 | F | 72 | I |  | Sphenoid Wing | 13.6 | Alive | 540 |
| Men 11 | M | 63 | I | 5 | Temporal | 72.6 | Alive | 540 |
| Men 12 | F | 52 | I | 2 | Parietal | 31.3 | Alive | 540 |
| Men 13 | M | 22 | I | 5 | Temporal | 6.1 | Alive | 540 |
| Men 14 | F | 52 | I | 5 | Tuberculum Sella | 7.1 | Alive | 540 |
| Men 15 | M | 29 | I |  | Occipital | 25.8 | Alive | 540 |
| Men 16 | F | 65 | I |  | Frontoparietal | 65.9 | Alive | 540 |
| Men 17 | M | 57 | III | 25 | Retroorbital | 24.8 | Alive | 540 |
| Men 18 | F | 54 | I | 4 | Cerebellar | 4.8 | Alive | 540 |
| Men 19 | F | 70 | I | 5 | Paraphalx Frontal | 78.1 | Alive | 540 |
| Men 20 | M | 72 | I | 7,5 | Paraphalx | 13.2 | Alive | 540 |
| Men 21 | F | 63 | II | 25 | Parietal | 84.7 | Alive | 540 |
| Men 22 | F | 44 | I | 2,5 | Occipital | 26.6 | Alive | 540 |
| Men 23 | M | 46 | I | 3 | Frontal | 22.1 | Alive | 540 |
| Men 24 | F | 39 | I | 3 | Frontal | 15 | Alive | 540 |
| Men 25 | M | 77 | II | 15 | Frontal | 37.6 | Alive | 540 |
| Men 26 | M | 73 | I | 10 | Parietotemporal | 61.2 | Died | 356 |
| Men 27 | F | 41 | II | 20 | Frontal | 3.1 | Alive | 540 |
| Men 28 | M | 37 | I | 7,5 | Frontal | 83.7 | Alive | 540 |
| Men 29 | F | 63 | I | 5 | Temporal | 2.9 | Alive | 540 |
| Men 30 | F | 60 | II | 3 | Parietal | 9.8 | Alive | 540 |
| Men 31 | F | 31 | I |  | İnterventricular | 23.8 | Alive | 540 |
| Men 32 | M | 70 | III | 50 | Parietal | 31.5 | Alive | 540 |
| Men 33 | F | 45 | I | 10 | Pontocerebellar Corner | 8.8 | Alive | 540 |
| Men 34 | F | 51 | I | 5 | Frontal | 30.9 | Alive | 540 |
| Men 35 | F | 34 | I | 2 | Birontal | 22.1 | Alive | 540 |
| Men 36 | F | 54 | II |  | Parietal | 66.5 | Alive | 540 |
| Men 37 | M | 26 | I | 1,5 | Olactor Grout | 4.7 | Alive | 540 |
| Men 38 | F | 46 | II | 20 | Temporal | 6.9 | Alive | 540 |

Men: Meningioma, F: Female, M: Male
